# Supplementary material for: Comparative genome analysis reveals the molecular basis of nicotine degradation and survival capacities of Arthrobacter
Source: PubMed Central journal article supplement (PMC4342571; doi:10.1038/srep08642), 2015-02-27
Supplement: srep08642-s1.pdf [file srep08642-s1.pdf]

# Supplementary information

## **Comparative genome analysis reveals the molecular basis of nicotine degradation and survival capacities of *Arthrobacter***

**Yuxiang Yao<sup>1,2†</sup>, Hongzhi Tang<sup>1,2†</sup>, Fei Su<sup>1,2</sup> and Ping Xu<sup>1,2#</sup>**

<sup>1</sup>State Key Laboratory of Microbial Metabolism, and School of Life Sciences & Biotechnology, Shanghai Jiao Tong University, Shanghai 200240, People's Republic of China

<sup>2</sup>Joint International Research Laboratory of Metabolic & Developmental Sciences, Shanghai Jiao Tong University, Shanghai 200240, People's Republic of China

\*Running title: Comparative genome analysis of *Arthrobacter*

#Address correspondence to: Ping Xu, School of Life Sciences and Biotechnology, Shanghai Jiao Tong University, Shanghai 200240, PR China. Tel: +86-21-34206723; Fax: +86-21-34206723; E-mail: pingxu@sjtu.edu.cn

†These authors contributed equally to this work.

**Table S1**

Oxidation of carbon sources by strain M2012083.

| Test<br>(oxidation of carbon sources) | Result | Test<br>(oxidation of carbon sources) | Result |
|---------------------------------------|--------|---------------------------------------|--------|
| 0 Control                             | -      | 25 Polychrom                          | +      |
| 1 Glycerol                            | +      | 26 Saligenin                          | -      |
| 2 Erythritol                          | +      | 27 Cellobiose                         | +      |
| 3 D-Arabinose                         | -      | 28 Maltose                            | -      |
| 4 L-Arabinose                         | -      | 29 Lactose                            | -      |
| 5 Ribose                              | -      | 30 Melibiose                          | W      |
| 6 D-Xylose                            | W      | 31 Sucrose                            | -      |
| 7 L-Xylose                            | -      | 32 Trehalose                          | -      |
| 8 Adonitol                            | -      | 33 Synanthrin                         | -      |
| 9 $\beta$ -Methyl-D-xyloside          | W      | 34 Melezitose                         | -      |
| 10 Galactose                          | -      | 35 Raffinose                          | -      |
| 11 Glucose                            | +      | 36 Starch                             | -      |
| 12 Fructose                           | +      | 37 Glycogen                           | -      |
| 13 Seminose                           | -      | 38 Xylitol                            | -      |
| 14 Sorbose                            | -      | 39 Gentiobiose                        | -      |
| 15 Rhamnose                           | -      | 40 D-Turanose                         | +      |
| 16 Dulcitol                           | -      | 41 D-Lyxose                           | -      |
| 17 Inositol                           | +      | 42 D-Tagatose                         | -      |
| 18 Mannitol                           | -      | 43 D-Fucose                           | -      |
| 19 Sorbitol                           | -      | 44 L-Fucose                           | -      |
| 20 $\alpha$ -Methyl-D-mannoside       | -      | 45 D-Arabitol                         | -      |
| 21 $\alpha$ -Methyl-D-glucoside       | -      | 46 L-Arabitol                         | -      |
| 22 <i>N</i> -Acetyl-glucosamine       | -      | 47 Gluconate                          | -      |
| 23 Amygdalin                          | +      | 48 2-Keto-gluconate                   | -      |
| 24 Arbutin                            | -      | 49 5-Keto-gluconate                   | -      |

-, negative reaction; +, positive reaction; W, weak positive reaction.

**Table S2**

Enzyme activities of strain M2012083.

| Enzyme                          | Result | Enzyme                           | Result |
|---------------------------------|--------|----------------------------------|--------|
| Alkaline phosphatase            | +      | $\alpha$ -Galactosidase          | +      |
| Esterase (C4)                   | W      | $\beta$ -Galactosidase           | +      |
| Lipoid esterase (C8)            | +      | $\beta$ -Glucuronidase           | +      |
| Lipase (C14)                    | -      | $\alpha$ -Glucosaccharase        | +      |
| Leucine aromatic aminopeptidase | +      | $\beta$ -Glucosaccharase         | +      |
| Valine aromatic aminopeptidase  | -      | <i>N</i> -Acetyl-glucosaminidase | +      |
| Cystine aromatic aminopeptidase | W      | $\alpha$ -Mannosidase            | +      |
| Trypsin                         | -      | $\beta$ -Fucosidase              | +      |
| Chymotrypsin                    | -      | Arginine dihydrogenase           | -      |
| Acid phosphatase                | +      | Urease                           | -      |
| Naphthol-AS-BI-phosphohydrolase | W      | Gelatinase                       | +      |
| Nitrate reduction               | -      | Indole production                | -      |

-, negative reaction; +, positive reaction; W, weak positive reaction.

**Table S3**

Utilization of carbon sources by strain M2012083.

| Test<br>(utilization of carbon sources) | Result | Test<br>(utilization of carbon sources) | Result |
|-----------------------------------------|--------|-----------------------------------------|--------|
| Water                                   | -      | D-Tagatose                              | -      |
| $\alpha$ -Cyclodextrin                  | -      | D-Trehalose                             | -      |
| $\beta$ -Cyclodextrin                   | -      | Turanose                                | +      |
| Dextrin                                 | +      | Xylitol                                 | -      |
| Glycogen                                | W      | D-Xylose                                | W      |
| Inulin                                  | -      | Acetate                                 | +      |
| Mannosan                                | -      | $\alpha$ -Hydroxybutyrate               | +      |
| Tween-40                                | +      | $\beta$ -Hydroxybutyrate                | +      |
| Tween-80                                | +      | $\gamma$ -Hydroxybutyrate               | +      |
| <i>N</i> -Acetyl-D-galactosamine        | +      | <i>p</i> -Hydroxyphenylacetic acid      | +      |
| <i>N</i> -Acetyl-D-glucosamine          | -      | $\alpha$ -Ketoglutarate                 | +      |
| Amygdalin                               | +      | $\alpha$ -Oxopentanoic acid             | +      |
| L-Arabinose                             | +      | Lactamide                               | +      |
| D-Arabinose                             | -      | D-Methyl lactate                        | -      |
| Arbutin                                 | +      | L-Lactate                               | +      |
| D-Cellobiose                            | +      | D-Malate                                | -      |
| D-Fructose                              | +      | L-Malate                                | W      |
| L-Fucose                                | +      | Methyl pyruvate                         | +      |
| D-Galactose                             | +      | mono-Methyl succinate                   | +      |
| D-Galacturonic acid                     | -      | Propionic acid                          | +      |
| Gentiobiose                             | +      | Pyruvate                                | +      |
| D-Gluconic acid                         | +      | Succinamic acid                         | +      |
| $\alpha$ -D-Glucose                     | +      | Succinate                               | -      |
| m-Inositol                              | +      | <i>N</i> -Acetyl-L-glutamate            | +      |
| $\alpha$ -D-Lactose                     | +      | L-Alaninamide                           | +      |
| Lactulose                               | +      | D-Alanine                               | +      |
| Maltose                                 | +      | L-Alanine                               | +      |
| Maltotriose                             | +      | L-Alanyl-glycine                        | +      |
| D-Mannitol                              | +      | L-Asparagine                            | +      |
| D-Mannose                               | +      | L-Glutamate                             | +      |
| D-Melezitose                            | +      | Glycyl-L-glutamine                      | +      |
| D-Melibiose                             | +      | L-Pyroglutamic acid                     | +      |
| $\alpha$ -Methyl-D-galactoside          | +      | L-Serine                                | +      |
| $\beta$ -Methyl-D-galactoside           | +      | Butanediamine                           | +      |
| 3-Methyl-D-glucose                      | -      | 2,3-Butanediol                          | -      |
| $\alpha$ -Methyl-D-glucoside            | -      | Glycerol                                | +      |

|                                            |   |                                  |   |
|--------------------------------------------|---|----------------------------------|---|
| $\beta$ -Methyl-D-glucoside                | - | Adenosine                        | + |
| $\alpha$ -Methyl-D-mannoside               | - | 2'-Deoxyadenosine                | - |
| 6-O-D-Glucopyranosyl-D-fructo<br>-furanose | + | Inosine                          | + |
| D-Allulose                                 | + | Thymidine                        | - |
| D-Melitriose                               | + | Uridine                          | - |
| L-Rhamnose                                 | + | 5'-Adenosine monophosphate       | + |
| D-Ribose                                   | + | 5'-Thymidine monophosphate       | - |
| Saligenin                                  | + | 5'-Uridine monophosphate         | + |
| Sedoheptulosan                             | - | 6-Phosphate-D-fructose           | - |
| D-sorbitol                                 | + | 1-Phosphate- $\alpha$ -D-glucose | - |
| Stachyose                                  | + | 6-Phosphate-D-glucose            | - |
| Sucrose                                    | + | D-L- $\alpha$ -Phosphoglycerol   | + |
| Decanoate                                  | - | Adipic acid                      | - |
| Citrate                                    | + | Phenylacetic acid                | W |

-, negative reaction; +, positive reaction; W, weak positive reaction.
